# Supplementary material for: MicroRNA-212-5p and its target PAFAH1B2 suppress vascular proliferation and contraction via the downregulation of RhoA
Source: PubMed Central journal article supplement (PMC7990166; doi:10.1371/journal.pone.0249146), 2021-03-24

Figure 4G Original WB blots

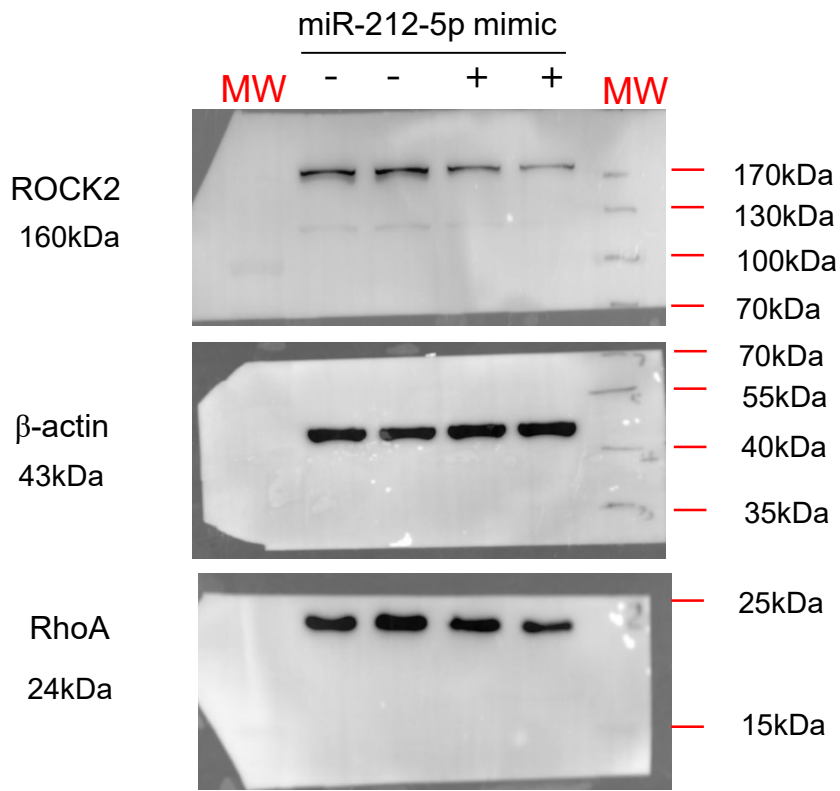

Figure 4I Original WB blots

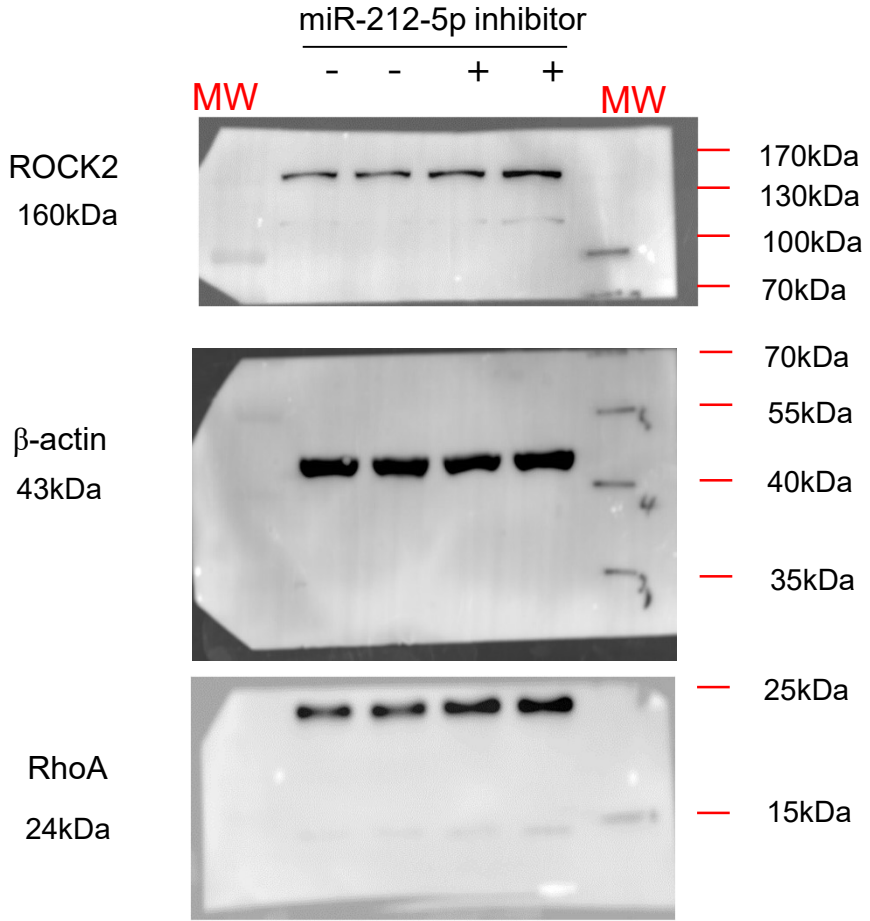

Figure 5D Original WB blots

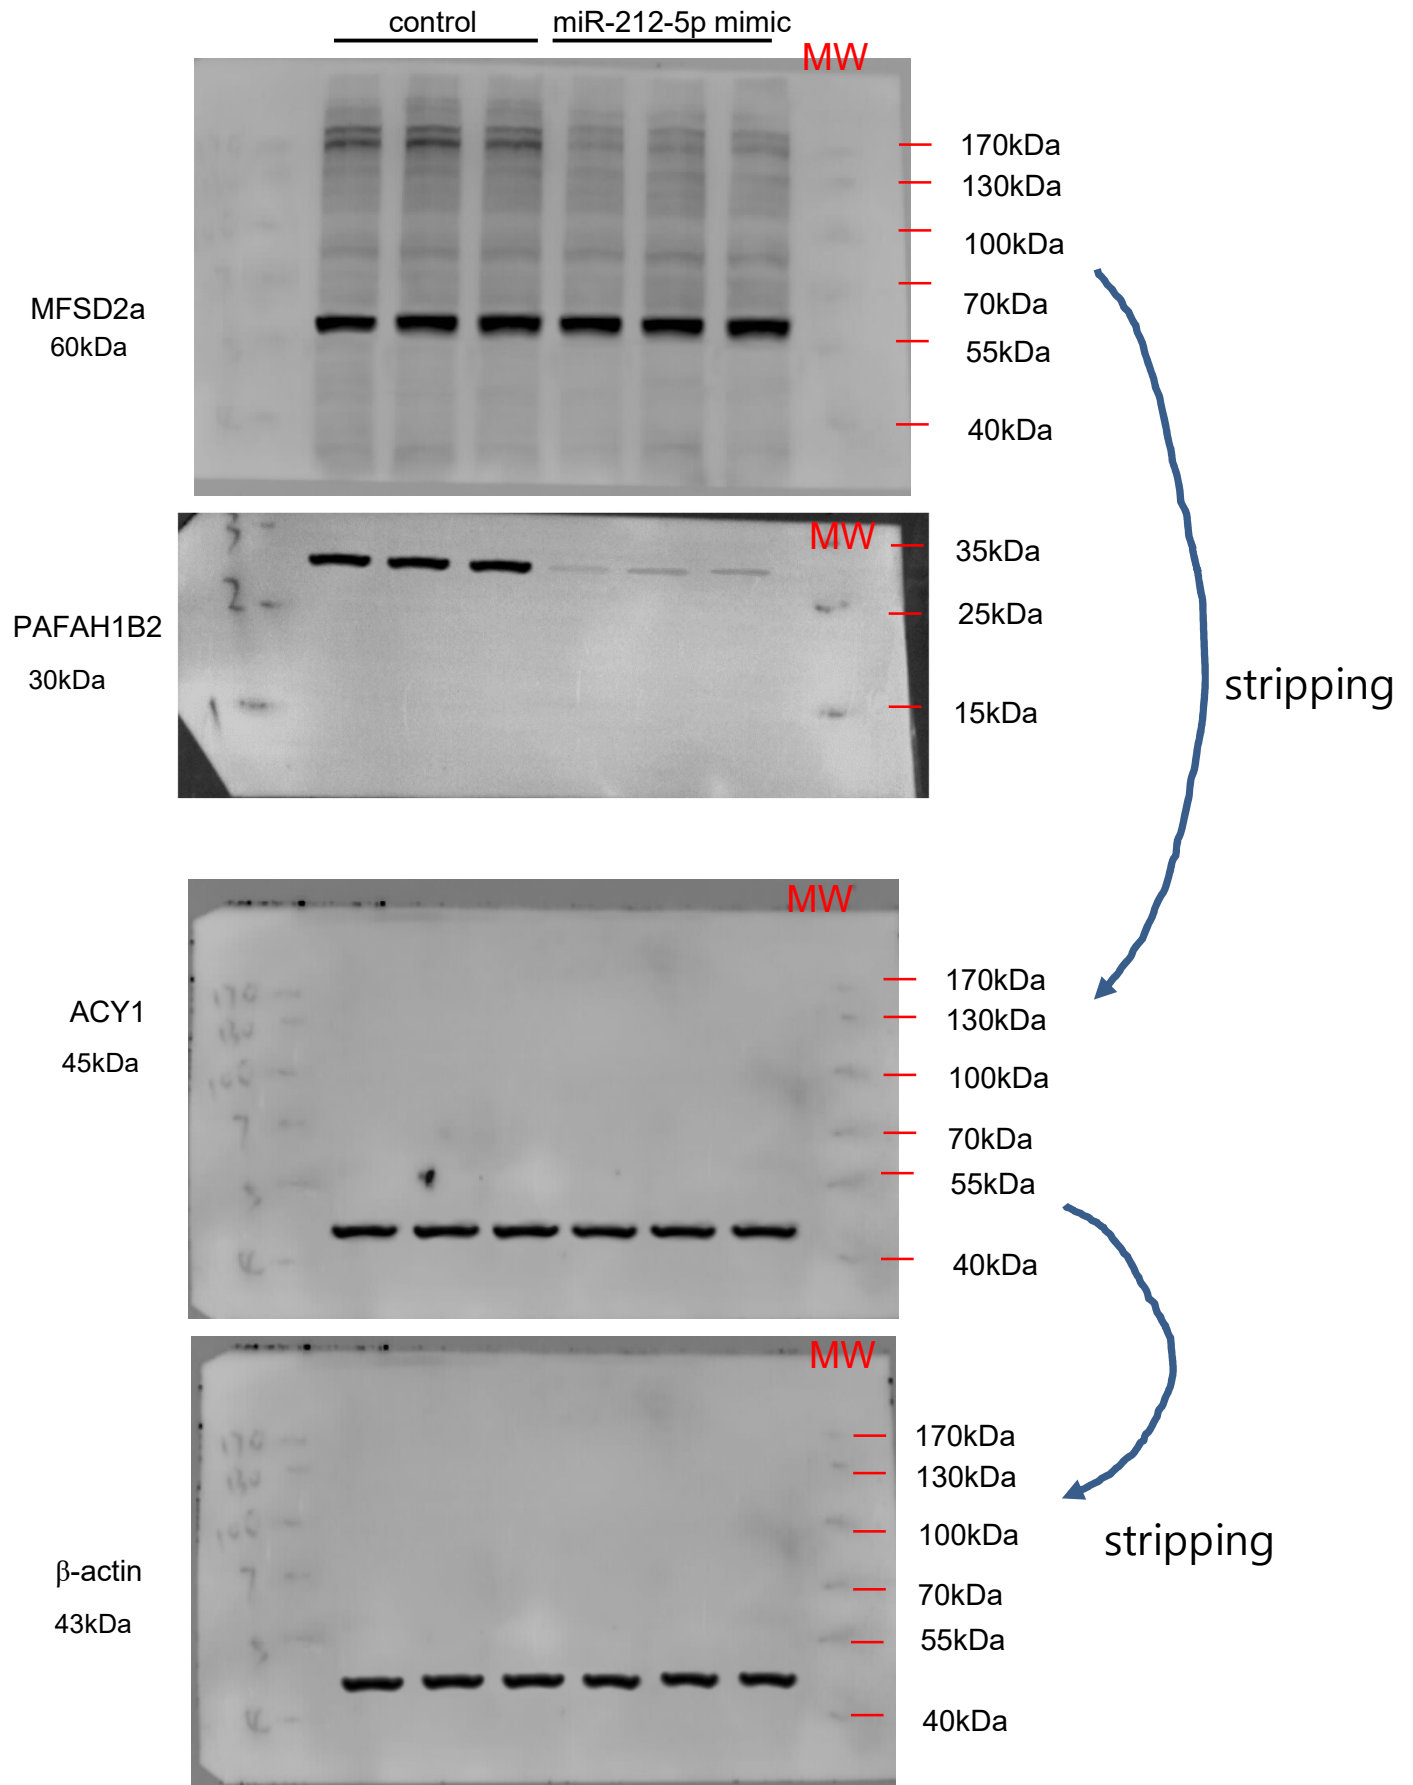

Figure 5H Original WB blots

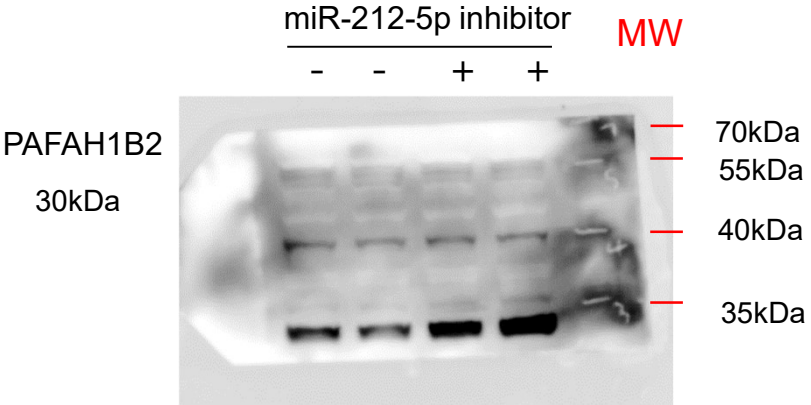

↓ stripping

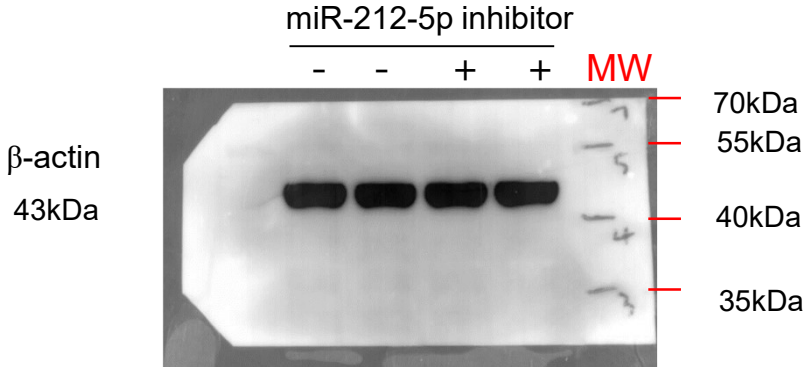



Figure 6D Original WB blots

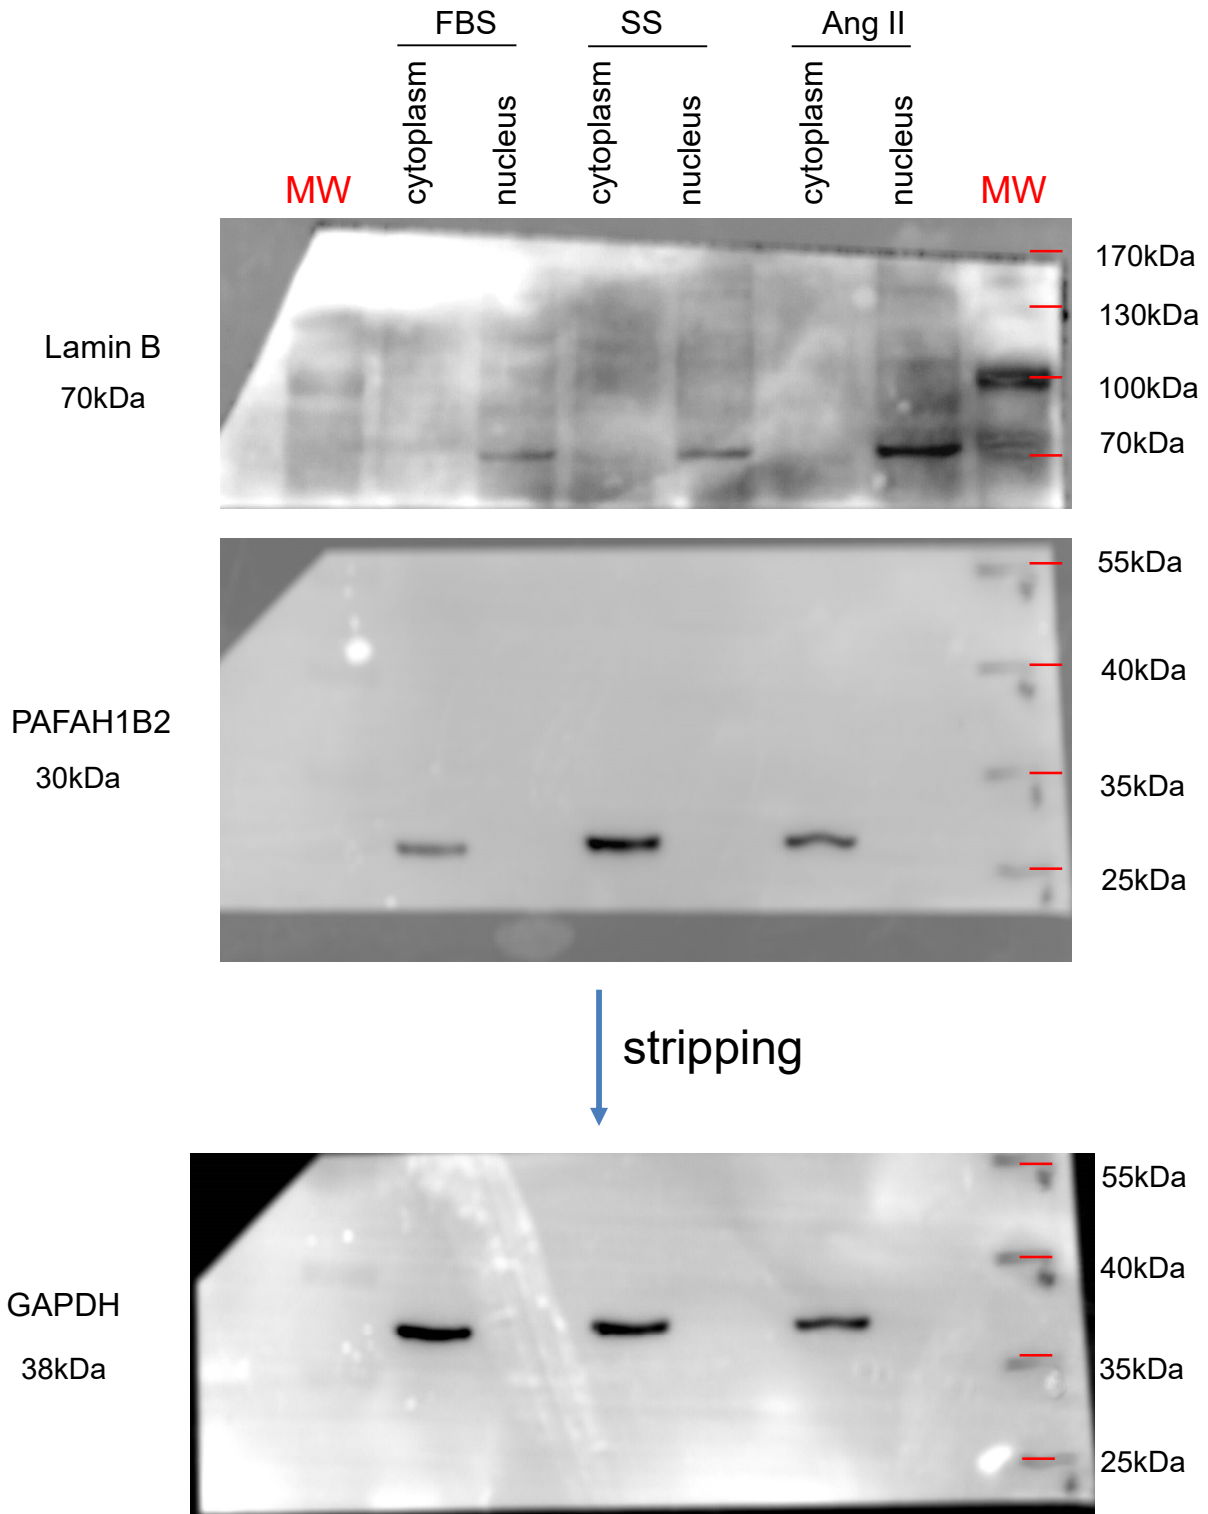

Figure 7I Original WB blots

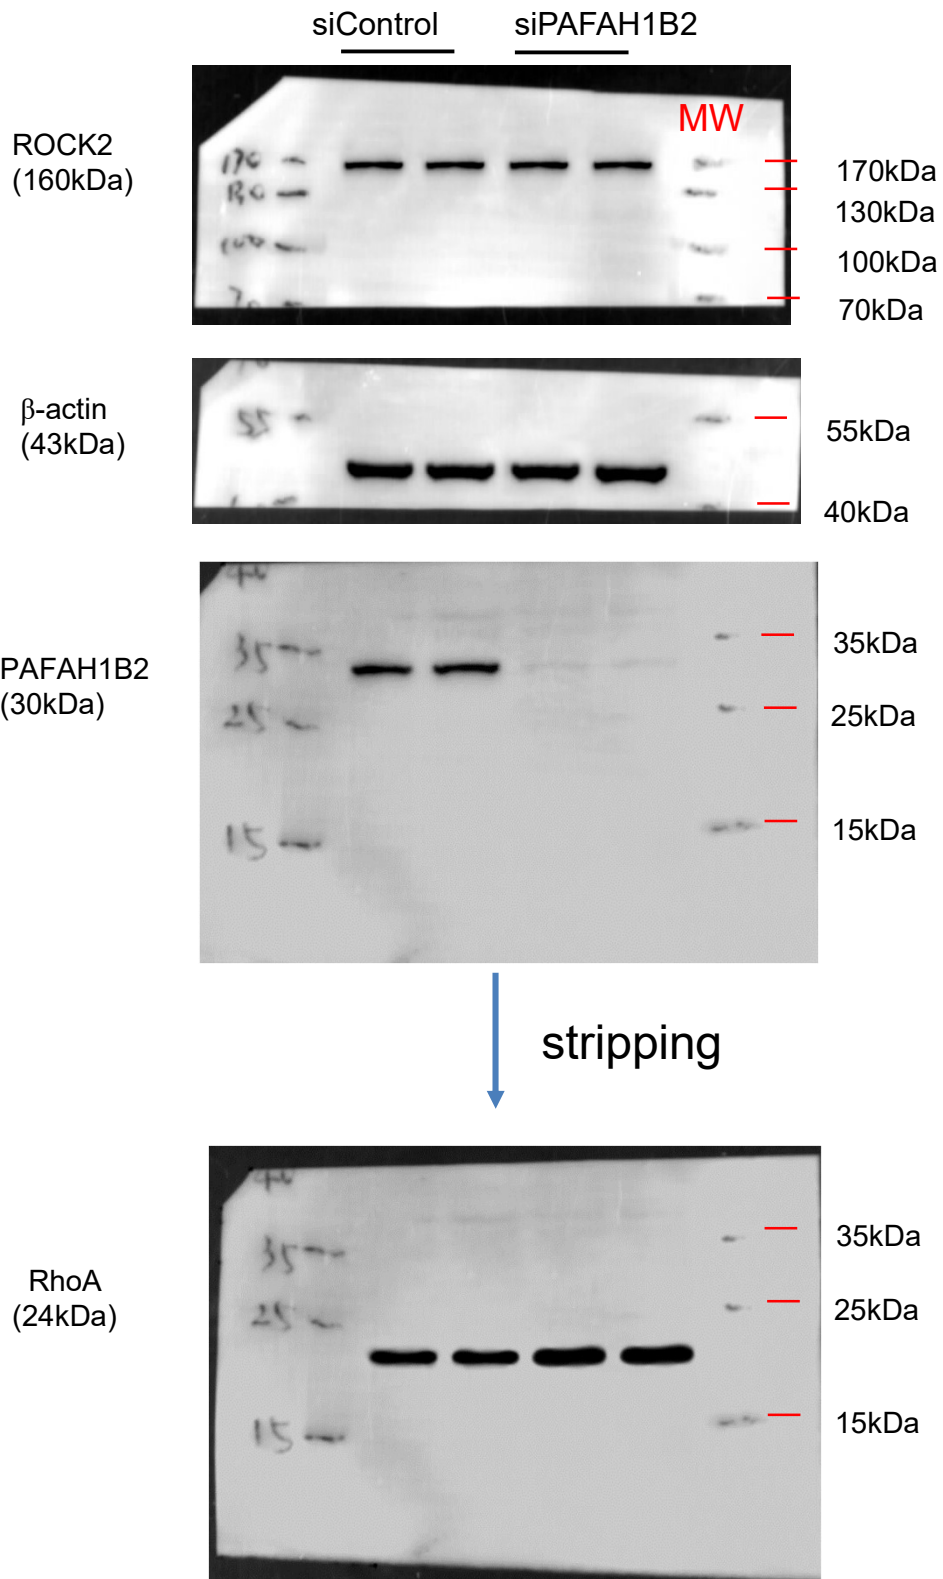

Supplement: pone.0249146.s001.pdf [file pone.0249146.s001.pdf]
